# Supplementary material for: Evaluation of Informatization Performance of Construction Industrialization EPC Enterprises in China
Source: Hindawi journal article supplement (doi:10.1155/2020/1314586), 2020-01-01
Supplement: f1 [file 1314586.f1.docx]

# Appendices

The relative efficiency of the first-level indicators of each evaluation unit were calculated.

**Table A1.** DEA relative efficiency value of first-level index of each DMU

| No | DMU | Score | Strategic Planning | Infrastructure Establishment | Team Formation | External Environmental | Financial Indicator | Business Process Performance | Management Performance | Market Performance | Impacts on Other Stakeholders | Learning and Growth |
| --- | --- | --- | --- | --- | --- | --- | --- | --- | --- | --- | --- | --- |
| 1 | DMU1 | 1.0000 | 1.0000 | 1.0000 | 1.0000 | 1.0000 | 1.0000 | 1.0000 | 1.0000 | 1.0000 | 1.0000 | 1.0000 |
| 2 | DMU2 | 1.0000 | 1.0000 | 1.0000 | 1.0000 | 1.0000 | 1.0000 | 1.0000 | 1.0000 | 1.0000 | 1.0000 | 1.0000 |
| 3 | DMU3 | 0.9156 | 0.7676 | 0.7676 | 0.7676 | 0.7676 | 0.4044 | 0.1963 | 1.0000 | 0.0817 | 1.0000 | 0.1589 |
| 4 | DMU4 | 1.0000 | 1.0000 | 1.0000 | 1.0000 | 1.0000 | 1.0000 | 1.0000 | 1.0000 | 1.0000 | 1.0000 | 1.0000 |
| 5 | DMU5 | 0.9960 | 0.9880 | 0.9880 | 0.9880 | 0.9880 | 0.3217 | 0.3849 | 0.3792 | 1.0000 | 0.1964 | 1.0000 |
| 6 | DMU6 | 1.0000 | 1.0000 | 1.0000 | 1.0000 | 1.0000 | 1.0000 | 1.0000 | 1.0000 | 1.0000 | 1.0000 | 1.0000 |
| 7 | DMU7 | 0.9980 | 0.9940 | 0.9940 | 0.9940 | 0.9940 | 1.0000 | 0.7469 | 1.0000 | 0.8754 | 0.7102 | 0.8858 |
| 8 | DMU8 | 0.9971 | 0.9913 | 0.7598 | 0.9913 | 0.9913 | 0.6738 | 1.0000 | 1.0000 | 0.9744 | 0.7683 | 1.0000 |
| 9 | DMU9 | 1.0000 | 1.0000 | 1.0000 | 1.0000 | 1.0000 | 1.0000 | 1.0000 | 1.0000 | 1.0000 | 1.0000 | 1.0000 |
| 10 | DMU10 | 0.7868 | 0.4871 | 0.3750 | 0.4871 | 0.4871 | 0.6270 | 0.5634 | 1.0000 | 1.0000 | 0.2161 | 1.0000 |
| 11 | DMU11 | 0.9164 | 0.7696 | 0.7275 | 0.7696 | 0.7696 | 0.355 | 0.483 | 0.8522 | 1.0000 | 0.1073 | 1.0000 |
| 12 | DMU12 | 0.9748 | 0.9263 | 0.9263 | 0.9263 | 0.9263 | 1.0000 | 0.4614 | 0.2546 | 0.8482 | 0.6596 | 1.0000 |
| 13 | DMU13 | 1.0000 | 1.0000 | 1.0000 | 1.0000 | 1.0000 | 1.0000 | 1.0000 | 1.0000 | 1.0000 | 1.0000 | 1.0000 |
| 14 | DMU14 | 1.0000 | 1.0000 | 1.0000 | 1.0000 | 1.0000 | 1.0000 | 1.0000 | 1.0000 | 1.0000 | 1.0000 | 1.0000 |
| 15 | DMU15 | 0.8621 | 0.6407 | 0.6407 | 0.6407 | 0.6407 | 0.9955 | 0.3513 | 1.0000 | 1.0000 | 0.7541 | 1.0000 |
| 16 | DMU16 | 1.0000 | 1.0000 | 1.0000 | 1.0000 | 1.0000 | 1.0000 | 1.0000 | 1.0000 | 1.0000 | 1.0000 | 1.0000 |
| 17 | DMU17 | 0.8822 | 0.6866 | 0.6866 | 0.6866 | 0.6866 | 0.9314 | 0.9432 | 1.0000 | 0.9484 | 1.0000 | 0.6124 |
| 18 | DMU18 | 0.8548 | 0.6246 | 0.6246 | 0.6246 | 0.6246 | 1.0000 | 0.6416 | 0.4782 | 0.882 | 0.9827 | 1.0000 |
| 19 | DMU19 | 0.9054 | 0.7422 | 0.7422 | 0.7422 | 0.7422 | 0.9946 | 0.9269 | 1.0000 | 0.837 | 0.4381 | 1.0000 |
| 20 | DMU20 | 0.8172 | 0.5457 | 0.5457 | 0.5457 | 0.5457 | 0.6163 | 0.4858 | 1.0000 | 0.9438 | 1.0000 | 1.0000 |
| 21 | DMU21 | 0.8952 | 0.7174 | 0.7174 | 0.7174 | 0.7174 | 0.0045 | 0.7143 | 0.5919 | 0.9516 | 0.7363 | 1.0000 |
| 22 | DMU22 | 1.0000 | 1.0000 | 1.0000 | 1.0000 | 1.0000 | 1.0000 | 1.0000 | 1.0000 | 1.0000 | 1.0000 | 1.0000 |
| 23 | DMU23 | 0.9165 | 0.7698 | 0.7698 | 0.7698 | 0.6414 | 1.0000 | 0.7953 | 1.0000 | 1.0000 | 0.9400 | 0.6939 |
| 24 | DMU24 | 1.0000 | 1.0000 | 1.0000 | 1.0000 | 1.0000 | 1.0000 | 1.0000 | 1.0000 | 1.0000 | 1.0000 | 1.0000 |
| 25 | DMU25 | 0.9341 | 0.8150 | 0.8150 | 0.8150 | 0.8150 | 1.0000 | 1.0000 | 1.0000 | 0.6558 | 1.0000 | 0.2199 |
| 26 | DMU26 | 0.9713 | 0.9163 | 0.9163 | 0.9163 | 0.9163 | 1.0000 | 1.0000 | 0.6995 | 0.8085 | 0.0000 | 1.0000 |
| 27 | DMU27 | 1.0000 | 1.0000 | 1.0000 | 1.0000 | 1.0000 | 1.0000 | 1.0000 | 1.0000 | 1.0000 | 1.0000 | 1.0000 |
| 28 | DMU28 | 0.9277 | 0.7984 | 0.7984 | 0.7984 | 0.7588 | 1.0000 | 0.7845 | 1.0000 | 0.3461 | 0.0000 | 0.0056 |
| 29 | DMU29 | 1.0000 | 1.0000 | 1.0000 | 1.0000 | 1.0000 | 1.0000 | 1.0000 | 1.0000 | 1.0000 | 1.0000 | 1.0000 |
| 30 | DMU30 | 0.8422 | 0.5974 | 0.5974 | 0.5974 | 0.3573 | 0.0184 | 0.8900 | 1.0000 | 1.0000 | 1.0000 | 0.0000 |
